# Supplementary material
Source: publisher site journal article supplement (https://www.dovepress.com/article/511534)
Supplement: Supplementary file 1 [file 511534-supplementary-material_1.pdf]

Supporting information for

**Exploring the Causal Role of miR-941 in Chronic Rhinosinusitis: Insights from  
Transcriptomics and Genomics**

**Supplementary Table S1.** Primers used for Quantitative Real-Time PCR analysis of  
microRNAs.

| Primer                            | Sequence                                                        |
|-----------------------------------|-----------------------------------------------------------------|
| miR-941 stem-loop RT              | 5'-GTCGTATCCAGTGCAGGGTCCGAGGTATTTCGCACTG<br>GATACGACGCACAT-3'   |
| miR-941 PCR Forward               | 5'-AAGCTTACACCCGGCTGTGTG-3'                                     |
| U6 stem-loop RT                   | 5'-GTCGTATCCAGTGCAGGGTCCGAGGTATTTCGCACTG<br>GATACGACAAAATATG-3' |
| U6 PCR Forward                    | 5'-CTCGCTTCGGCAGCACA-3'                                         |
| microRNA PCR universal<br>Reverse | 5'-ATCCAGTGCAGGGTCCGAGG-3'                                      |

**Supplementary Table S2.** The list of Antibody.

| Antibody  | Cat No.    | Vendor         | Application |
|-----------|------------|----------------|-------------|
| p110 beta | ab151549   | Abcam          | WB,1:1000   |
| p85 Alpha | 60225-1-Ig | proteintech    | WB,1:2000   |
| P-AKT     | 4060       | Cell Signaling | WB,1:1000   |
| AKT       | 60203-2-Ig | proteintech    | WB,1:5000   |
| GADPH     | 10494-1-AP | proteintech    | WB,1:10000  |

**Supplementary Table S3.** Summary of patient's characteristics.

| Variable                      | Control         | CRSwNP       | P-value |
|-------------------------------|-----------------|--------------|---------|
| Total of patient,n            | 13              | 28           |         |
| Age,yr mean±SD                | 46.69(14.13)    | 43.25(14.64) | 0.480   |
| Female,n(%)                   | 4(30.77)        | 11(39.29)    | 0.734   |
| BMI,kg/m <sup>2</sup> mean±SD | 23.75(2.25)     | 24.56(3.42)  | 0.368   |
| Smoker,n(%)                   | 2(15.38)        | 10(35.71)    | 0.276   |
| SNOT-22 score,<br>median(IQR) | -               | 27.3(13.1)   |         |
| Blood eosinophil(%)           | 1.33(0.75)      | 2.85(1.40)   | <0.001  |
| Methodology used              |                 |              |         |
| MicroRNA array                | 6 <sup>△</sup>  | 7            |         |
| Age(mean±SD)                  | 38.83(17.58)    | 35.14(13.58) | 0.677   |
| qRT-PCR                       | 13 <sup>△</sup> | 28           |         |
| Age(mean±SD)                  | 46.69(14.13)    | 43.25(14.64) | 0.480   |
| WB                            | 3               | 3            |         |
| Age(mean±SD)                  | 55.67(4.93)     | 53.00(4.36)  | 0.522   |

BMI, Body Mass Index; SNOT-22, Sino-Nasal Outcome Test-22; qRT-PCR, Quantitative real-time PCR; WB, Western Blot.

<sup>△</sup>MicroRNA banking from nasal tissue was unsuccessful in one patient due to sample depletion. Consequently, the counts for plasma assays conducted were n=6 and n=13, while those for tissue assays were adjusted to n=5 and n=12, respectively.

**Supplementary Table S4. Differentially expressed miRNAs in whole blood: CRS**patients versus controls( $|\log_2(\text{Fold Change})|>0.58$ ,  $p\text{-value}<0.05$ )

| #ID              | Pvalue   | FDR   | log2FC | regulated |
|------------------|----------|-------|--------|-----------|
| hsa-miR-941      | 3.19E-06 | 0.012 | 1.485  | up        |
| hsa-miR-200a-3p  | 1.28E-04 | 0.232 | 3.396  | up        |
| novel_miR_1978   | 1.64E-03 | 0.457 | -4.172 | down      |
| novel_miR_383    | 9.08E-04 | 0.457 | -4.101 | down      |
| novel_miR_209    | 1.25E-03 | 0.457 | -2.785 | down      |
| hsa-miR-25-5p    | 8.24E-04 | 0.457 | -1.792 | down      |
| hsa-miR-323b-3p  | 1.50E-03 | 0.457 | -1.640 | down      |
| hsa-miR-6747-3p  | 4.61E-04 | 0.457 | -1.257 | down      |
| hsa-miR-4732-3p  | 1.64E-03 | 0.457 | -0.885 | down      |
| hsa-miR-151b     | 1.47E-03 | 0.457 | 0.923  | up        |
| novel_miR_1426   | 1.01E-03 | 0.457 | 1.283  | up        |
| hsa-miR-877-5p   | 7.64E-04 | 0.457 | 1.331  | up        |
| hsa-miR-30c-2-3p | 5.54E-04 | 0.457 | 4.323  | up        |
| hsa-miR-3158-3p  | 2.23E-03 | 0.576 | 1.048  | up        |
| novel_miR_1960   | 4.55E-03 | 0.649 | -1.780 | down      |
| novel_miR_688    | 5.26E-03 | 0.649 | -1.633 | down      |
| hsa-miR-1343-3p  | 4.56E-03 | 0.649 | -1.260 | down      |
| novel_miR_263    | 4.11E-03 | 0.649 | -1.227 | down      |
| novel_miR_2080   | 3.53E-03 | 0.649 | -1.170 | down      |

|                 |          |       |        |      |
|-----------------|----------|-------|--------|------|
| novel_miR_2794  | 3.52E-03 | 0.649 | -1.170 | down |
| hsa-miR-627-3p  | 5.30E-03 | 0.649 | -1.017 | down |
| novel_miR_924   | 3.50E-03 | 0.649 | -1.008 | down |
| hsa-miR-6857-3p | 4.90E-03 | 0.649 | -0.973 | down |
| hsa-miR-4742-3p | 5.47E-03 | 0.649 | -0.787 | down |
| hsa-miR-3688-3p | 3.80E-03 | 0.649 | 0.789  | up   |
| hsa-miR-151a-5p | 4.18E-03 | 0.649 | 0.829  | up   |
| hsa-miR-29c-5p  | 3.41E-03 | 0.649 | 0.879  | up   |
| hsa-miR-143-3p  | 4.21E-03 | 0.649 | 0.947  | up   |
| hsa-miR-582-3p  | 5.45E-03 | 0.649 | 1.090  | up   |
| hsa-miR-200a-5p | 5.49E-03 | 0.649 | 1.779  | up   |
| hsa-miR-6502-5p | 5.57E-03 | 0.649 | 3.609  | up   |
| hsa-miR-1-3p    | 5.81E-03 | 0.656 | 1.674  | up   |
| hsa-miR-3121-3p | 6.43E-03 | 0.704 | -3.489 | down |
| novel_miR_538   | 6.67E-03 | 0.709 | -0.817 | down |
| novel_miR_650   | 6.97E-03 | 0.720 | -0.819 | down |
| hsa-miR-3173-5p | 7.43E-03 | 0.746 | -0.784 | down |
| hsa-miR-3620-3p | 7.82E-03 | 0.764 | -1.838 | down |
| novel_miR_1897  | 8.69E-03 | 0.766 | -2.895 | down |
| novel_miR_773   | 8.63E-03 | 0.766 | -0.854 | down |
| hsa-miR-454-5p  | 8.31E-03 | 0.766 | -0.737 | down |
| novel_miR_1582  | 8.39E-03 | 0.766 | 0.958  | up   |

|                 |          |       |        |      |
|-----------------|----------|-------|--------|------|
| hsa-miR-4512    | 1.02E-02 | 0.775 | -2.964 | down |
| hsa-miR-6508-3p | 1.09E-02 | 0.775 | -2.244 | down |
| novel_miR_1022  | 1.03E-02 | 0.775 | -2.161 | down |
| novel_miR_1753  | 1.08E-02 | 0.775 | -1.801 | down |
| hsa-miR-1284    | 9.11E-03 | 0.775 | -0.833 | down |
| hsa-miR-328-3p  | 1.07E-02 | 0.775 | -0.705 | down |
| hsa-miR-18a-3p  | 9.60E-03 | 0.775 | -0.690 | down |
| hsa-miR-769-5p  | 1.09E-02 | 0.775 | 0.699  | up   |
| hsa-miR-148a-3p | 1.01E-02 | 0.775 | 1.076  | up   |
| novel_miR_1401  | 9.27E-03 | 0.775 | 3.147  | up   |
| hsa-miR-6855-3p | 1.13E-02 | 0.782 | -1.095 | down |
| hsa-miR-3190-3p | 1.15E-02 | 0.782 | 1.180  | up   |
| hsa-miR-125a-5p | 1.18E-02 | 0.791 | -0.859 | down |
| hsa-miR-433-3p  | 1.26E-02 | 0.825 | -1.597 | down |
| novel_miR_1639  | 1.47E-02 | 0.885 | -1.799 | down |
| novel_miR_2807  | 1.41E-02 | 0.885 | -1.454 | down |
| novel_miR_62    | 1.44E-02 | 0.885 | -0.773 | down |
| hsa-miR-3913-5p | 1.49E-02 | 0.885 | 0.744  | up   |
| novel_miR_1434  | 1.42E-02 | 0.885 | 1.454  | up   |
| hsa-miR-942-3p  | 1.55E-02 | 0.904 | 0.957  | up   |
| hsa-miR-6804-3p | 1.58E-02 | 0.908 | -1.920 | down |
| novel_miR_212   | 1.67E-02 | 0.913 | -3.510 | down |

|                  |          |       |        |      |
|------------------|----------|-------|--------|------|
| novel_miR_7      | 1.64E-02 | 0.913 | -3.297 | down |
| novel_miR_2829   | 1.66E-02 | 0.913 | 2.549  | up   |
| novel_miR_2739   | 1.72E-02 | 0.914 | -2.769 | down |
| hsa-miR-1976     | 1.70E-02 | 0.914 | -0.923 | down |
| novel_miR_2933   | 1.76E-02 | 0.923 | -1.837 | down |
| hsa-miR-3200-5p  | 1.83E-02 | 0.945 | 0.910  | up   |
| novel_miR_1799   | 1.95E-02 | 0.950 | -1.706 | down |
| novel_miR_2782   | 1.91E-02 | 0.950 | -1.236 | down |
| hsa-miR-4504     | 1.90E-02 | 0.950 | 0.975  | up   |
| hsa-miR-576-3p   | 1.93E-02 | 0.950 | 1.029  | up   |
| hsa-miR-548ar-3p | 1.97E-02 | 0.950 | 2.535  | up   |
| novel_miR_1342   | 2.36E-02 | 0.951 | -3.320 | down |
| novel_miR_1206   | 2.21E-02 | 0.951 | -2.623 | down |
| novel_miR_2872   | 2.31E-02 | 0.951 | -2.507 | down |
| novel_miR_3      | 2.08E-02 | 0.951 | -1.873 | down |
| novel_miR_2245   | 2.26E-02 | 0.951 | -1.403 | down |
| hsa-miR-641      | 2.37E-02 | 0.951 | -1.381 | down |
| novel_miR_1934   | 2.23E-02 | 0.951 | -0.620 | down |
| novel_miR_1561   | 2.05E-02 | 0.951 | 0.804  | up   |
| hsa-miR-659-5p   | 2.27E-02 | 0.951 | 0.818  | up   |
| hsa-miR-5009-5p  | 2.10E-02 | 0.951 | 0.844  | up   |
| hsa-miR-10b-5p   | 2.26E-02 | 0.951 | 0.865  | up   |

|                 |          |       |        |      |
|-----------------|----------|-------|--------|------|
| hsa-miR-551a    | 2.24E-02 | 0.951 | 1.217  | up   |
| hsa-miR-181b-3p | 2.13E-02 | 0.951 | 1.480  | up   |
| hsa-miR-206     | 2.28E-02 | 0.951 | 2.527  | up   |
| novel_miR_2603  | 2.41E-02 | 0.955 | -0.837 | down |
| novel_miR_2947  | 2.47E-02 | 0.961 | -1.334 | down |
| novel_miR_2780  | 2.47E-02 | 0.961 | 3.883  | up   |
| novel_miR_560   | 2.53E-02 | 0.973 | 3.738  | up   |
| hsa-miR-942-5p  | 2.57E-02 | 0.977 | -0.649 | down |
| novel_miR_2388  | 2.65E-02 | 0.986 | -1.196 | down |
| hsa-miR-146b-3p | 2.64E-02 | 0.986 | 0.847  | up   |
| novel_miR_2927  | 3.87E-02 | 1.000 | -3.420 | down |
| novel_miR_2569  | 4.22E-02 | 1.000 | -3.343 | down |
| novel_miR_1771  | 4.22E-02 | 1.000 | -3.141 | down |
| novel_miR_2008  | 3.09E-02 | 1.000 | -3.120 | down |
| novel_miR_2301  | 3.92E-02 | 1.000 | -3.116 | down |
| novel_miR_2525  | 2.92E-02 | 1.000 | -3.098 | down |
| novel_miR_1039  | 4.85E-02 | 1.000 | -2.878 | down |
| novel_miR_1284  | 4.83E-02 | 1.000 | -2.878 | down |
| novel_miR_1938  | 3.93E-02 | 1.000 | -2.533 | down |
| novel_miR_1604  | 4.06E-02 | 1.000 | -2.468 | down |
| novel_miR_2720  | 4.86E-02 | 1.000 | -2.178 | down |
| novel_miR_1884  | 4.36E-02 | 1.000 | -2.160 | down |

|                  |          |       |        |      |
|------------------|----------|-------|--------|------|
| hsa-miR-30b-3p   | 4.04E-02 | 1.000 | -1.832 | down |
| novel_miR_1149   | 4.61E-02 | 1.000 | -1.715 | down |
| hsa-miR-20b-3p   | 4.86E-02 | 1.000 | -1.614 | down |
| novel_miR_2529   | 3.00E-02 | 1.000 | -1.422 | down |
| novel_miR_1070   | 4.56E-02 | 1.000 | -1.388 | down |
| hsa-miR-7848-3p  | 4.19E-02 | 1.000 | -1.138 | down |
| novel_miR_913    | 3.42E-02 | 1.000 | -1.073 | down |
| novel_miR_2018   | 3.79E-02 | 1.000 | -1.033 | down |
| novel_miR_1548   | 3.79E-02 | 1.000 | -1.033 | down |
| hsa-miR-10527-5p | 2.97E-02 | 1.000 | -0.964 | down |
| novel_miR_309    | 4.55E-02 | 1.000 | -0.890 | down |
| hsa-miR-937-3p   | 3.98E-02 | 1.000 | -0.793 | down |
| hsa-miR-4435     | 3.79E-02 | 1.000 | -0.785 | down |
| hsa-miR-1271-5p  | 2.94E-02 | 1.000 | -0.769 | down |
| novel_miR_1271   | 2.92E-02 | 1.000 | -0.757 | down |
| hsa-miR-3074-5p  | 3.37E-02 | 1.000 | -0.653 | down |
| novel_miR_1533   | 4.01E-02 | 1.000 | 0.743  | up   |
| novel_miR_559    | 4.03E-02 | 1.000 | 0.751  | up   |
| hsa-miR-181c-3p  | 4.59E-02 | 1.000 | 0.791  | up   |
| hsa-miR-4714-5p  | 3.24E-02 | 1.000 | 0.839  | up   |
| hsa-miR-378c     | 3.27E-02 | 1.000 | 0.880  | up   |
| hsa-miR-628-3p   | 4.27E-02 | 1.000 | 0.887  | up   |

|                 |          |       |       |    |
|-----------------|----------|-------|-------|----|
| novel_miR_2774  | 4.56E-02 | 1.000 | 0.892 | up |
| hsa-miR-375-3p  | 2.84E-02 | 1.000 | 1.018 | up |
| novel_miR_2448  | 4.33E-02 | 1.000 | 1.053 | up |
| hsa-miR-96-5p   | 4.18E-02 | 1.000 | 1.084 | up |
| hsa-miR-499a-5p | 4.99E-02 | 1.000 | 1.233 | up |
| hsa-miR-589-3p  | 2.94E-02 | 1.000 | 1.297 | up |
| hsa-miR-200b-3p | 3.95E-02 | 1.000 | 1.359 | up |
| hsa-miR-34c-5p  | 4.07E-02 | 1.000 | 1.452 | up |
| hsa-miR-378f    | 3.28E-02 | 1.000 | 1.592 | up |
| hsa-miR-3675-3p | 3.97E-02 | 1.000 | 1.694 | up |
| novel_miR_2975  | 4.21E-02 | 1.000 | 1.695 | up |
| novel_miR_2214  | 3.97E-02 | 1.000 | 1.864 | up |
| novel_miR_2918  | 4.04E-02 | 1.000 | 2.128 | up |
| novel_miR_753   | 4.26E-02 | 1.000 | 2.140 | up |
| hsa-miR-6755-3p | 3.37E-02 | 1.000 | 2.497 | up |
| hsa-miR-708-3p  | 3.00E-02 | 1.000 | 2.761 | up |
| novel_miR_1464  | 3.06E-02 | 1.000 | 2.971 | up |
| novel_miR_2978  | 3.06E-02 | 1.000 | 2.971 | up |
| novel_miR_2127  | 3.06E-02 | 1.000 | 2.971 | up |
| novel_miR_786   | 3.05E-02 | 1.000 | 2.971 | up |
| novel_miR_2950  | 4.56E-02 | 1.000 | 3.525 | up |

---

log2FC, log2 Fold Change(CRSwNP vs.Control); FDR, False Discovery Rate

**Supplementary Table S5.** Differentially expressed miRNAs in nasal tissue: CRS patients versus controls( $|\log_2(\text{Fold Change})|>0.58$ ,  $p\text{-value}<0.05$ )

| #ID             | Pvalue   | FDR   | log2FC | regulated |
|-----------------|----------|-------|--------|-----------|
| hsa-miR-582-3p  | 6.33E-06 | 0.020 | -1.736 | down      |
| hsa-miR-338-3p  | 1.68E-05 | 0.024 | -1.903 | down      |
| hsa-miR-21-3p   | 3.65E-05 | 0.024 | 1.843  | up        |
| novel_miR_2310  | 4.14E-05 | 0.024 | -3.226 | down      |
| novel_miR_1319  | 4.87E-05 | 0.024 | -3.177 | down      |
| hsa-miR-941     | 4.98E-05 | 0.024 | 1.581  | up        |
| hsa-miR-1249-3p | 5.53E-05 | 0.024 | -2.043 | down      |
| hsa-miR-582-5p  | 1.09E-04 | 0.042 | -1.593 | down      |
| hsa-miR-338-5p  | 3.04E-04 | 0.104 | -1.458 | down      |
| hsa-miR-223-3p  | 4.73E-04 | 0.134 | 2.536  | up        |
| hsa-miR-491-5p  | 4.78E-04 | 0.134 | -1.282 | down      |
| hsa-miR-5571-3p | 5.39E-04 | 0.139 | 2.027  | up        |
| novel_miR_2113  | 6.51E-04 | 0.155 | -1.573 | down      |
| hsa-miR-375-3p  | 8.90E-04 | 0.178 | -1.633 | down      |
| hsa-miR-1298-5p | 9.11E-04 | 0.178 | -3.036 | down      |
| hsa-miR-4423-3p | 9.41E-04 | 0.178 | 4.025  | up        |
| hsa-miR-3611    | 1.05E-03 | 0.178 | 4.392  | up        |
| hsa-miR-187-3p  | 1.15E-03 | 0.178 | -1.612 | down      |
| novel_miR_1879  | 1.16E-03 | 0.178 | -1.337 | down      |

|                  |          |       |        |      |
|------------------|----------|-------|--------|------|
| novel_miR_2774   | 1.18E-03 | 0.178 | 2.640  | up   |
| novel_miR_1283   | 1.21E-03 | 0.178 | -2.843 | down |
| hsa-miR-548i     | 1.33E-03 | 0.187 | 3.227  | up   |
| novel_miR_819    | 1.44E-03 | 0.194 | -1.221 | down |
| novel_miR_1696   | 1.72E-03 | 0.222 | -1.592 | down |
| novel_miR_2385   | 1.83E-03 | 0.227 | -2.332 | down |
| hsa-miR-10a-3p   | 2.08E-03 | 0.247 | 2.830  | up   |
| novel_miR_38     | 2.21E-03 | 0.254 | -4.333 | down |
| hsa-miR-3150b-3p | 2.37E-03 | 0.262 | 2.309  | up   |
| hsa-miR-147b-3p  | 2.46E-03 | 0.262 | 1.891  | up   |
| hsa-miR-10a-5p   | 2.72E-03 | 0.280 | 2.330  | up   |
| hsa-miR-4423-5p  | 2.89E-03 | 0.281 | 3.874  | up   |
| novel_miR_2258   | 2.99E-03 | 0.281 | -2.425 | down |
| hsa-miR-92b-5p   | 3.00E-03 | 0.281 | 1.879  | up   |
| novel_miR_1330   | 3.61E-03 | 0.329 | -3.866 | down |
| hsa-miR-1260b    | 3.87E-03 | 0.342 | 1.091  | up   |
| hsa-miR-142-5p   | 4.44E-03 | 0.381 | 1.299  | up   |
| hsa-miR-224-3p   | 4.78E-03 | 0.400 | 1.583  | up   |
| hsa-miR-1180-3p  | 5.78E-03 | 0.468 | 1.233  | up   |
| hsa-miR-223-5p   | 5.98E-03 | 0.468 | 1.447  | up   |
| hsa-miR-934      | 6.05E-03 | 0.468 | 1.511  | up   |
| hsa-miR-449a     | 6.57E-03 | 0.496 | 2.521  | up   |

|                   |          |       |        |      |
|-------------------|----------|-------|--------|------|
| novel_miR_74      | 6.75E-03 | 0.497 | -3.447 | down |
| novel_miR_1518    | 7.63E-03 | 0.521 | -2.984 | down |
| novel_miR_1313    | 7.81E-03 | 0.521 | 5.909  | up   |
| novel_miR_1179    | 7.82E-03 | 0.521 | -1.647 | down |
| hsa-miR-148a-5p   | 7.94E-03 | 0.521 | -1.009 | down |
| hsa-miR-576-3p    | 8.03E-03 | 0.521 | 0.992  | up   |
| hsa-miR-642a-5p   | 8.20E-03 | 0.521 | 1.870  | up   |
| hsa-miR-129-5p    | 8.43E-03 | 0.521 | -1.445 | down |
| hsa-miR-372-3p    | 8.43E-03 | 0.521 | 1.953  | up   |
| hsa-miR-2355-3p   | 8.58E-03 | 0.521 | 1.451  | up   |
| novel_miR_2886    | 9.56E-03 | 0.569 | 2.454  | up   |
| hsa-miR-5091      | 1.05E-02 | 0.579 | -1.494 | down |
| novel_miR_1533    | 1.06E-02 | 0.579 | 2.678  | up   |
| hsa-miR-135a-5p   | 1.09E-02 | 0.579 | 1.914  | up   |
| hsa-miR-449b-5p   | 1.09E-02 | 0.579 | 2.533  | up   |
| hsa-miR-148a-3p   | 1.10E-02 | 0.579 | -0.977 | down |
| hsa-miR-1251-5p   | 1.10E-02 | 0.579 | 1.956  | up   |
| hsa-miR-4709-3p   | 1.10E-02 | 0.579 | 1.672  | up   |
| hsa-miR-135a-2-3p | 1.14E-02 | 0.586 | 2.037  | up   |
| hsa-miR-449b-3p   | 1.16E-02 | 0.586 | 2.074  | up   |
| novel_miR_570     | 1.17E-02 | 0.586 | -1.345 | down |
| hsa-miR-892a      | 1.20E-02 | 0.588 | -2.182 | down |

|                   |          |       |        |      |
|-------------------|----------|-------|--------|------|
| novel_miR_1154    | 1.23E-02 | 0.593 | -3.375 | down |
| novel_miR_2177    | 1.25E-02 | 0.593 | -4.635 | down |
| novel_miR_896     | 1.30E-02 | 0.603 | -3.205 | down |
| novel_miR_2422    | 1.31E-02 | 0.603 | 1.977  | up   |
| hsa-miR-378c      | 1.36E-02 | 0.611 | 0.798  | up   |
| novel_miR_2161    | 1.36E-02 | 0.611 | -2.222 | down |
| hsa-miR-142-3p    | 1.38E-02 | 0.611 | 1.235  | up   |
| novel_miR_2145    | 1.46E-02 | 0.635 | -3.012 | down |
| hsa-miR-196a-5p   | 1.53E-02 | 0.655 | 2.285  | up   |
| hsa-miR-2110      | 1.59E-02 | 0.655 | 1.098  | up   |
| hsa-miR-548az-5p  | 1.62E-02 | 0.655 | -1.236 | down |
| hsa-miR-221-3p    | 1.63E-02 | 0.655 | 0.849  | up   |
| novel_miR_1509    | 1.66E-02 | 0.655 | -1.504 | down |
| hsa-miR-3622b-3p  | 1.67E-02 | 0.655 | -2.582 | down |
| hsa-miR-431-5p    | 1.67E-02 | 0.655 | 1.772  | up   |
| hsa-miR-1185-1-3p | 1.68E-02 | 0.655 | 1.407  | up   |
| hsa-miR-642a-3p   | 1.74E-02 | 0.655 | 1.728  | up   |
| hsa-miR-4679      | 1.75E-02 | 0.655 | 1.243  | up   |
| novel_miR_1738    | 1.76E-02 | 0.655 | -4.102 | down |
| hsa-miR-1185-2-3p | 1.78E-02 | 0.655 | 1.714  | up   |
| hsa-miR-9-5p      | 1.79E-02 | 0.655 | -0.862 | down |
| novel_miR_2585    | 1.80E-02 | 0.655 | -1.816 | down |

|                   |          |       |        |      |
|-------------------|----------|-------|--------|------|
| hsa-miR-4425      | 1.84E-02 | 0.661 | 3.824  | up   |
| novel_miR_1908    | 1.89E-02 | 0.664 | 5.136  | up   |
| hsa-miR-382-5p    | 1.89E-02 | 0.664 | 1.010  | up   |
| hsa-miR-664b-5p   | 1.99E-02 | 0.685 | 1.457  | up   |
| novel_miR_1457    | 2.01E-02 | 0.685 | -0.950 | down |
| novel_miR_1114    | 2.01E-02 | 0.685 | -0.950 | down |
| hsa-miR-4477b     | 2.04E-02 | 0.687 | 3.437  | up   |
| hsa-miR-210-3p    | 2.09E-02 | 0.694 | 0.858  | up   |
| hsa-miR-1301-3p   | 2.12E-02 | 0.694 | 0.786  | up   |
| novel_miR_93      | 2.13E-02 | 0.694 | 1.742  | up   |
| hsa-miR-450a-2-3p | 2.21E-02 | 0.700 | 1.929  | up   |
| hsa-miR-92b-3p    | 2.22E-02 | 0.700 | 1.325  | up   |
| hsa-miR-592       | 2.26E-02 | 0.700 | 1.225  | up   |
| hsa-miR-381-3p    | 2.27E-02 | 0.700 | 1.012  | up   |
| hsa-miR-10b-3p    | 2.28E-02 | 0.700 | 0.955  | up   |
| novel_miR_2654    | 2.31E-02 | 0.700 | -1.402 | down |
| hsa-miR-9-3p      | 2.34E-02 | 0.700 | -0.814 | down |
| hsa-miR-16-1-3p   | 2.39E-02 | 0.700 | 1.042  | up   |
| novel_miR_1831    | 2.40E-02 | 0.700 | -1.686 | down |
| novel_miR_1176    | 2.41E-02 | 0.700 | -2.457 | down |
| hsa-miR-5588-5p   | 2.42E-02 | 0.700 | 3.658  | up   |
| hsa-miR-483-5p    | 2.42E-02 | 0.700 | 1.249  | up   |

|                  |          |       |        |      |
|------------------|----------|-------|--------|------|
| hsa-miR-190b-5p  | 2.44E-02 | 0.700 | 1.620  | up   |
| novel_miR_1691   | 2.46E-02 | 0.700 | -3.646 | down |
| hsa-miR-629-5p   | 2.50E-02 | 0.701 | 1.003  | up   |
| novel_miR_2660   | 2.51E-02 | 0.701 | -1.783 | down |
| hsa-miR-4491     | 2.65E-02 | 0.729 | 1.946  | up   |
| novel_miR_2253   | 2.66E-02 | 0.729 | -2.291 | down |
| hsa-miR-491-3p   | 2.70E-02 | 0.730 | 3.880  | up   |
| hsa-miR-181b-3p  | 2.72E-02 | 0.730 | 1.066  | up   |
| novel_miR_668    | 2.74E-02 | 0.730 | -1.370 | down |
| novel_miR_2495   | 2.78E-02 | 0.735 | -1.878 | down |
| novel_miR_2065   | 2.83E-02 | 0.741 | -1.859 | down |
| hsa-miR-203a-3p  | 2.88E-02 | 0.744 | -1.013 | down |
| novel_miR_476    | 2.90E-02 | 0.744 | 3.505  | up   |
| hsa-miR-21-5p    | 2.91E-02 | 0.744 | 0.918  | up   |
| hsa-miR-3944-5p  | 3.04E-02 | 0.756 | -3.556 | down |
| hsa-miR-34b-3p   | 3.06E-02 | 0.756 | 2.146  | up   |
| novel_miR_2201   | 3.06E-02 | 0.756 | -2.060 | down |
| hsa-miR-944      | 3.07E-02 | 0.756 | 0.916  | up   |
| hsa-miR-629-3p   | 3.10E-02 | 0.756 | 1.821  | up   |
| hsa-miR-346      | 3.17E-02 | 0.756 | -1.343 | down |
| hsa-miR-129-2-3p | 3.18E-02 | 0.756 | -2.161 | down |
| novel_miR_654    | 3.19E-02 | 0.756 | 1.105  | up   |

|                  |          |       |        |      |
|------------------|----------|-------|--------|------|
| hsa-miR-222-5p   | 3.20E-02 | 0.756 | 1.281  | up   |
| hsa-miR-1306-5p  | 3.24E-02 | 0.756 | -0.971 | down |
| novel_miR_994    | 3.24E-02 | 0.756 | 1.376  | up   |
| hsa-miR-449c-5p  | 3.25E-02 | 0.756 | 2.346  | up   |
| novel_miR_1069   | 3.28E-02 | 0.757 | -1.529 | down |
| novel_miR_1334   | 3.33E-02 | 0.763 | -0.937 | down |
| novel_miR_2556   | 3.43E-02 | 0.769 | -0.807 | down |
| novel_miR_916    | 3.43E-02 | 0.769 | -0.807 | down |
| novel_miR_310    | 3.43E-02 | 0.769 | -3.866 | down |
| novel_miR_1538   | 3.48E-02 | 0.775 | -2.267 | down |
| novel_miR_483    | 3.58E-02 | 0.787 | 3.593  | up   |
| hsa-miR-520a-3p  | 3.67E-02 | 0.787 | -2.942 | down |
| novel_miR_880    | 3.68E-02 | 0.787 | 1.176  | up   |
| novel_miR_984    | 3.70E-02 | 0.787 | -1.328 | down |
| novel_miR_35     | 3.71E-02 | 0.787 | -1.191 | down |
| hsa-miR-548ay-3p | 3.72E-02 | 0.787 | 2.166  | up   |
| novel_miR_381    | 3.72E-02 | 0.787 | -1.630 | down |
| novel_miR_1561   | 3.74E-02 | 0.787 | 0.818  | up   |
| hsa-miR-628-5p   | 3.78E-02 | 0.787 | -0.803 | down |
| novel_miR_1359   | 3.81E-02 | 0.787 | 4.097  | up   |
| novel_miR_1323   | 3.81E-02 | 0.787 | -1.358 | down |
| hsa-miR-654-5p   | 3.89E-02 | 0.797 | 0.882  | up   |

|                  |          |       |        |      |
|------------------|----------|-------|--------|------|
| novel_miR_2676   | 4.03E-02 | 0.820 | 3.519  | up   |
| novel_miR_2387   | 4.08E-02 | 0.825 | -4.000 | down |
| hsa-miR-345-3p   | 4.14E-02 | 0.825 | -1.370 | down |
| hsa-miR-5708     | 4.15E-02 | 0.825 | -2.160 | down |
| hsa-miR-211-5p   | 4.22E-02 | 0.825 | -2.165 | down |
| novel_miR_1337   | 4.22E-02 | 0.825 | -4.074 | down |
| hsa-miR-4528     | 4.23E-02 | 0.825 | 4.313  | up   |
| hsa-miR-146b-5p  | 4.24E-02 | 0.825 | 0.822  | up   |
| novel_miR_52     | 4.28E-02 | 0.828 | -3.687 | down |
| novel_miR_923    | 4.34E-02 | 0.828 | -2.404 | down |
| hsa-miR-6502-3p  | 4.35E-02 | 0.828 | -3.610 | down |
| hsa-miR-590-5p   | 4.36E-02 | 0.828 | 1.545  | up   |
| novel_miR_818    | 4.42E-02 | 0.833 | -3.893 | down |
| novel_miR_2627   | 4.54E-02 | 0.848 | 3.358  | up   |
| novel_miR_298    | 4.57E-02 | 0.848 | 4.216  | up   |
| hsa-miR-4524a-5p | 4.57E-02 | 0.848 | -3.662 | down |
| novel_miR_2095   | 4.61E-02 | 0.849 | -2.444 | down |
| novel_miR_2466   | 4.76E-02 | 0.862 | -0.881 | down |
| hsa-miR-6503-3p  | 4.78E-02 | 0.862 | 1.083  | up   |
| novel_miR_1040   | 4.82E-02 | 0.862 | 3.655  | up   |
| hsa-miR-1273h-3p | 4.84E-02 | 0.862 | 1.186  | up   |
| novel_miR_1048   | 4.85E-02 | 0.862 | 1.957  | up   |

|                 |          |       |        |      |
|-----------------|----------|-------|--------|------|
| hsa-miR-548ba   | 4.86E-02 | 0.862 | -1.624 | down |
| hsa-miR-6508-3p | 4.87E-02 | 0.862 | -2.481 | down |
| novel_miR_1945  | 4.95E-02 | 0.870 | -2.139 | down |
| novel_miR_2354  | 4.99E-02 | 0.870 | 1.107  | up   |

---

log2FC, log2 Fold Change(CRSwNP vs.Control); FDR, False Discovery Rate.



**Supplementary Table S6.** Characteristics of genetic variants used to estimate the effect of miR-941 on Ebi and Finn chronic sinusitis

| SNP       | chr | pos      | A1 | A2 | R <sup>2</sup> | F      | Mir-941 |       |          | Ebi chronic sinusitis |       |          | Finn chronic sinusitis |       |          |
|-----------|-----|----------|----|----|----------------|--------|---------|-------|----------|-----------------------|-------|----------|------------------------|-------|----------|
|           |     |          |    |    |                |        | beta    | se    | P-value  | beta                  | se    | P-value  | beta                   | se    | P-value  |
| rs2427550 | 20  | 62547575 | C  | A  | 0.060          | 45.035 | 0.157   | 0.023 | 3.96E-11 | 0.041                 | 0.016 | 1.11E-02 | 0.027                  | 0.018 | 1.20E-01 |
| rs3795156 | 20  | 62518729 | A  | G  | 0.030          | 22.038 | 0.093   | 0.020 | 3.22E-06 | 0.021                 | 0.015 | 1.72E-01 | 0.024                  | 0.017 | 1.49E-01 |
| rs817374  | 20  | 62533435 | T  | G  | 0.058          | 43.977 | 0.157   | 0.024 | 6.85E-11 | 0.046                 | 0.019 | 1.42E-02 | 0.027                  | 0.018 | 1.29E-01 |

SNP, single nucleotide polymorphism; A1, effect allele; A2, other allele; se, standard error.

**Supplementary Table S7.** Characteristics of genetic variants used to estimate the effect of Ebi and Finn chronic sinusitis on miR-941

| SNP         | chr | pos       | A1 | A2 | R <sup>2</sup> | F      | Ebi chronic sinusitis |       |          | Mir-941 |       |          |
|-------------|-----|-----------|----|----|----------------|--------|-----------------------|-------|----------|---------|-------|----------|
|             |     |           |    |    |                |        | beta                  | se    | P-value  | beta    | se    | P-value  |
| rs11616662  | 13  | 41119466  | G  | A  | 5.20E-05       | 23.543 | 0.151                 | 0.031 | 1.19E-06 | 0.006   | 0.033 | 8.60E-01 |
| rs138167616 | 6   | 31027907  | C  | T  | 1.09E-04       | 49.446 | 0.288                 | 0.041 | 2.07E-12 | 0.012   | 0.087 | 8.88E-01 |
| rs1395381   | 7   | 123432100 | T  | C  | 5.43E-05       | 24.566 | 0.136                 | 0.028 | 6.91E-07 | 0.017   | 0.043 | 6.89E-01 |
| rs142776301 | 4   | 148700372 | C  | T  | 4.79E-05       | 21.670 | 0.147                 | 0.032 | 3.22E-06 | -0.046  | 0.059 | 4.37E-01 |
| rs1444782   | 10  | 9062856   | G  | A  | 5.58E-05       | 25.271 | 0.074                 | 0.015 | 5.12E-07 | 0.014   | 0.021 | 5.25E-01 |
| rs1508116   | 2   | 41518455  | T  | C  | 5.34E-05       | 24.174 | 0.089                 | 0.018 | 8.61E-07 | 0.010   | 0.025 | 6.76E-01 |
| rs1837253   | 5   | 110401872 | C  | T  | 6.90E-05       | 31.224 | 0.083                 | 0.015 | 2.32E-08 | -0.015  | 0.024 | 5.39E-01 |
| rs367863202 | 6   | 29758571  | A  | G  | 1.06E-04       | 48.184 | 0.285                 | 0.041 | 3.78E-12 | -0.043  | 0.057 | 4.47E-01 |
| rs56014700  | 2   | 44937109  | A  | G  | 5.03E-05       | 22.767 | 0.317                 | 0.067 | 1.80E-06 | -0.044  | 0.070 | 5.34E-01 |
| rs57900739  | 3   | 193012475 | A  | G  | 5.08E-05       | 22.971 | 0.067                 | 0.014 | 1.72E-06 | 0.017   | 0.023 | 4.64E-01 |

|            |            |            |           |           |                      |          |                               |           |                |                |           |                |
|------------|------------|------------|-----------|-----------|----------------------|----------|-------------------------------|-----------|----------------|----------------|-----------|----------------|
| rs67254554 | 22         | 41448734   | G         | A         | 5.29E-05             | 23.931   | 0.091                         | 0.019     | 1.06E-06       | 0.110          | 0.033     | 9.24E-04       |
| rs72699191 | 9          | 6211813    | C         | T         | 7.73E-05             | 34.973   | 0.137                         | 0.023     | 3.26E-09       | 0.008          | 0.027     | 7.74E-01       |
| rs73052255 | 3          | 190530830  | C         | T         | 4.72E-05             | 21.358   | 0.194                         | 0.042     | 3.77E-06       | 0.059          | 0.031     | 6.23E-02       |
| rs9519399  | 13         | 105245396  | T         | C         | 6.01E-05             | 27.184   | 0.076                         | 0.015     | 1.81E-07       | -0.013         | 0.023     | 5.59E-01       |
| rs982273   | 11         | 8906862    | T         | G         | 5.12E-05             | 23.168   | 0.072                         | 0.015     | 1.58E-06       | -0.015         | 0.021     | 4.86E-01       |
|            |            |            |           |           |                      |          | <b>Finn chronic sinusitis</b> |           |                | <b>Mir-941</b> |           |                |
| <b>SNP</b> | <b>chr</b> | <b>pos</b> | <b>A1</b> | <b>A2</b> | <b>R<sup>2</sup></b> | <b>F</b> | <b>beta</b>                   | <b>se</b> | <b>P-value</b> | <b>beta</b>    | <b>se</b> | <b>P-value</b> |
| rs10185815 | 2          | 42973439   | G         | A         | 1.21E-04             | 21.342   | 0.089                         | 0.019     | 3.72E-06       | -0.012         | 0.023     | 6.06E-01       |
| rs1110331  | 16         | 89774396   | G         | A         | 1.35E-04             | 23.808   | 0.085                         | 0.017     | 1.03E-06       | 0.032          | 0.020     | 1.16E-01       |
| rs1503625  | 4          | 127705493  | G         | A         | 1.34E-04             | 23.563   | 0.093                         | 0.019     | 1.26E-06       | 0.027          | 0.024     | 2.71E-01       |
| rs17624321 | 5          | 110430488  | G         | A         | 2.57E-04             | 45.373   | 0.120                         | 0.018     | 1.76E-11       | 0.009          | 0.023     | 7.05E-01       |
| rs2095044  | 9          | 6192796    | T         | C         | 3.04E-04             | 53.677   | 0.141                         | 0.019     | 2.18E-13       | 0.018          | 0.023     | 4.47E-01       |
| rs2691441  | 1          | 58002491   | T         | C         | 1.35E-04             | 23.885   | 0.095                         | 0.020     | 1.04E-06       | 0.017          | 0.024     | 4.60E-01       |

|            |    |           |   |   |          |        |       |       |          |        |       |          |
|------------|----|-----------|---|---|----------|--------|-------|-------|----------|--------|-------|----------|
| rs281379   | 19 | 49209851  | A | G | 1.22E-04 | 21.481 | 0.077 | 0.017 | 3.41E-06 | 0.013  | 0.020 | 5.40E-01 |
| rs3135041  | 6  | 31555657  | G | A | 1.24E-04 | 21.926 | 0.089 | 0.019 | 2.90E-06 | 0.018  | 0.023 | 4.34E-01 |
| rs35425557 | 1  | 77874558  | G | A | 1.22E-04 | 21.512 | 0.097 | 0.021 | 3.59E-06 | -0.033 | 0.029 | 2.48E-01 |
| rs3758212  | 9  | 127069753 | T | C | 1.32E-04 | 23.266 | 0.082 | 0.017 | 1.30E-06 | -0.025 | 0.022 | 2.59E-01 |
| rs4305404  | 3  | 15554233  | A | G | 1.31E-04 | 23.163 | 0.121 | 0.025 | 1.51E-06 | 0.059  | 0.029 | 3.96E-02 |
| rs838948   | 12 | 125178410 | A | G | 1.22E-04 | 21.567 | 0.171 | 0.037 | 3.36E-06 | -0.036 | 0.052 | 4.90E-01 |
| rs841339   | 1  | 95142843  | G | A | 1.28E-04 | 22.537 | 0.402 | 0.085 | 2.06E-06 | -0.049 | 0.077 | 5.24E-01 |
| rs9488660  | 6  | 97769261  | A | G | 1.26E-04 | 22.192 | 0.078 | 0.017 | 2.40E-06 | 0.024  | 0.021 | 2.50E-01 |
| rs950018   | 12 | 87860883  | G | A | 1.21E-04 | 21.287 | 0.160 | 0.035 | 3.90E-06 | 0.079  | 0.052 | 1.25E-01 |

---

SNP, single nucleotide polymorphism; A1, effect allele; A2, other allele; se, standard error.
